# Supplementary material for: Disrupting Bordetella Immunosuppression Reveals a Role for Eosinophils in Coordinating the Adaptive Immune Response in the Respiratory Tract
Source: MDPI journal article supplement (doi:10.3390/microorganisms8111808), 2020-11-17
Supplement: s1 [file s1]

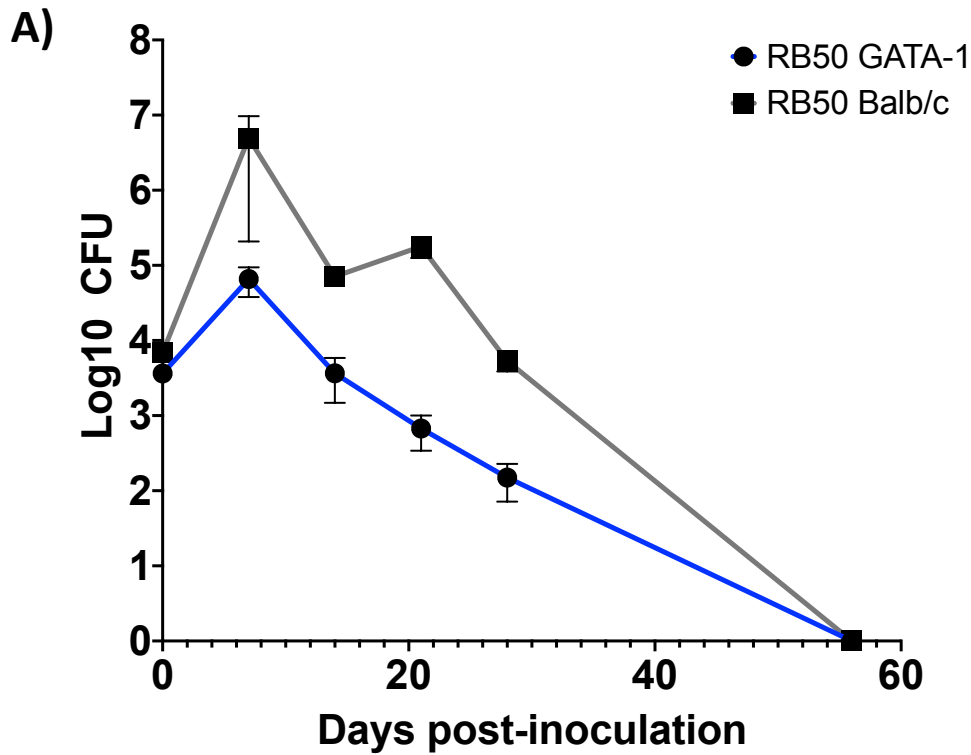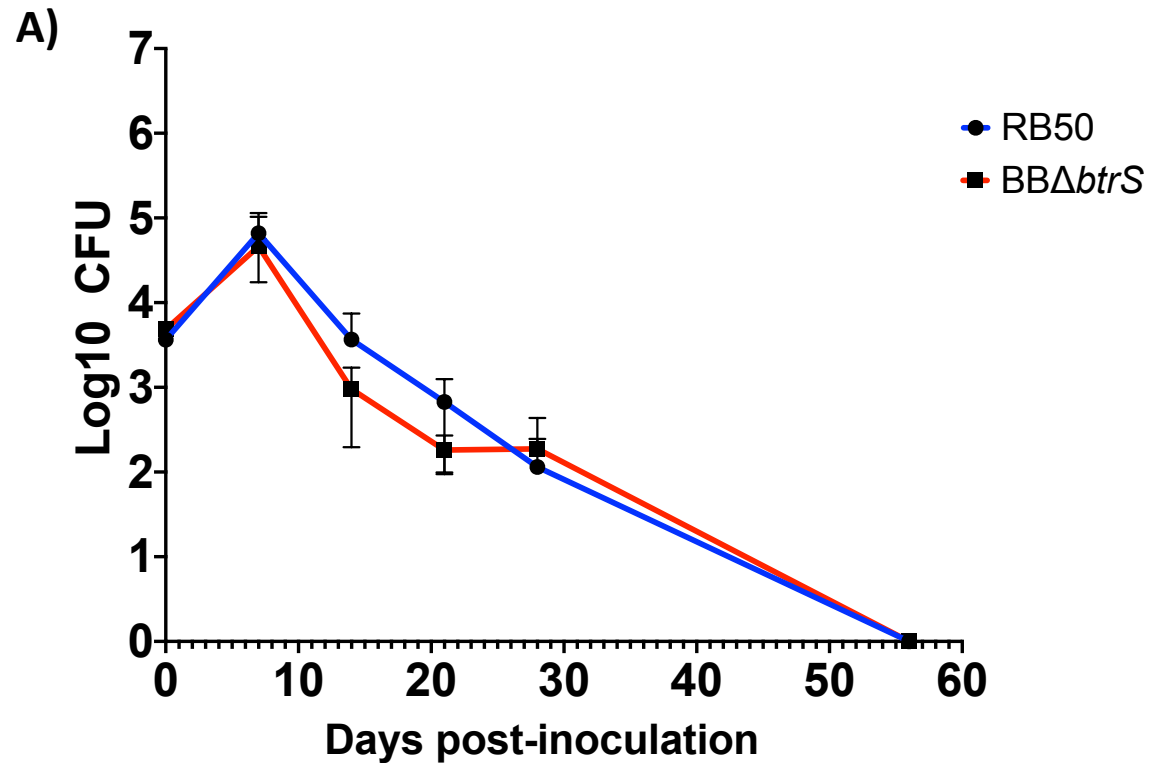

**Figure S1: Colonization levels in the lungs of Balb/c and  $\Delta$ dblGATA-1 mice following infection with RB50 and BB $\Delta$ btrS.** Mice were intranasally inoculated with PBS containing  $5 \times 10^5$  CFU of RB50 (blue in GATA-1 and grey in Balb/c) or BB $\Delta$ btrS (red). Mice were euthanized at different times to enumerate colonization levels in the lungs. Lungs of Balb/c (grey) and  $\Delta$ dblGATA-1 (blue) revealed similar levels of colonization when challenged with RB50 (A).  $\Delta$ dblGATA-1 challenged with RB50 (blue) or BB $\Delta$ btrS (red) presented similar colonization dynamics (B). N= 6-10 mice per condition and time point
